# Supplementary material for: Hypervalence: A Useful Concept or One That Should Be Gracefully Retired?
Source: MDPI journal article supplement (doi:10.3390/chemistry4040082), 2022-10-08
Supplement: s1 [file s1]

# Hypervalence: A Useful Concept or One that Should be Gracefully Retired?

Nicholas C Norman and Paul G Pringle

## Supplementary Material

### Contents

|       |                                                                         |     |
|-------|-------------------------------------------------------------------------|-----|
| 1.    | General MO description of p-block element compounds $EX_n$ .....        | S2  |
| 2.    | Further discussion of MO diagrams for some $EF_n$ compounds .....       | S3  |
| 2.1   | Lone pairs and valence in $IF_3$ and $XeF_4$ .....                      | S3  |
| 2.2   | Delocalisation on to the F ligands in $PF_5$ and related species .....  | S6  |
| 3.    | General MO energy-level diagrams for p-block compounds $EX_n$ .....     | S8  |
| 3.1   | Ten-electron systems: $EX_5$ , $EX_4L$ , $EX_3L_2$ , $EX_2L_3$ .....    | S9  |
| 3.1.1 | $EX_5$ ( $D_{3h}$ ) .....                                               | S9  |
| 3.1.2 | $EX_4L$ ( $C_{2v}$ ) .....                                              | S10 |
| 3.1.3 | $EX_3L_2$ ( $C_{2v}$ ) .....                                            | S11 |
| 3.1.4 | $EX_2L_3$ ( $D_{\infty h}$ ) .....                                      | S12 |
| 3.2   | Twelve-electron systems: $EX_6$ , $EX_5L$ , $EX_4L_2$ , $EX_2L_3$ ..... | S13 |
| 3.2.1 | $EX_6$ ( $O_h$ ) .....                                                  | S13 |
| 3.2.2 | $EX_5L$ ( $C_{4v}$ ) .....                                              | S14 |
| 3.2.3 | $EX_4L_2$ ( $D_{4h}$ ) .....                                            | S15 |
| 3.3   | Fourteen-electron systems: $EX_7$ , $EX_6L$ .....                       | S16 |
| 3.3.1 | $EX_7$ ( $D_{5h}$ ) .....                                               | S16 |
| 3.3.2 | $EX_6L$ ( $C_{3v}$ ) .....                                              | S17 |
| 3.3.3 | $EX_6L$ ( $O_h$ ) .....                                                 | S18 |
| 3.4   | Sixteen-electron systems: $EX_8$ ( $D_{4d}$ ) .....                     | S19 |
| 3.5   | Eighteen-electron systems: $EX_8L$ ( $D_{4d}$ ) .....                   | S20 |

## 1. General MO description of p-block element compounds $EX_n$

Figure S1 is a general MO energy-level diagram for compounds of the form  $EX_n$  that have a formal electron count of more than 8 and where E is a p-block element that is less electronegative than X. It is based on a ligand group orbital (LGO) approach featuring symmetry-allowed interactions. It is assumed that:

- (a) the involvement of d-orbitals is negligible;
- (b) s-p mixing does not fundamentally change the energy order of the MOs;
- (c)  $\pi$ -bonding interactions arising from negative hyperconjugation can be ignored at this level of approximation.

Figure S1 represents a fusion of the features that emerge from the analysis of the MO diagrams for individual  $EX_n$  species that are given in Section 3.

In Figure S1, the frontier molecular orbitals for  $EX_n$  are collected into 5 bands. The number of LGOs generated for  $EX_n$  will be  $n$ , of which  $x$  will not have a symmetry match with any of the s or p orbitals on E and so will remain non-bonding orbitals that are localised solely on the X ligands. As a consequence, there will be  $n - x$  orbitals that are E–X bonding. One of the bonding MOs will be formed from the interaction of the s orbital on E with the totally symmetric LGO on X and will have symmetry label  $a$ ,  $a_1$ ,  $a_g$ ,  $a_{1g}$ ,  $a'$ , or  $a_1'$  according to the symmetry of the s orbital within the point group for  $EX_n$ ; the antibonding counterpart of this bonding orbital is labelled " $a_1$ " in Figure S1. The energy of " $a_1$ " will depend on the efficiency of the orbital overlap between the s orbital on E and the appropriate LGO. The more diffuse the s orbital on E, the lower the energy of the antibonding combination " $a_1$ " and therefore, the energy of " $a_1$ " would be expected to become lower, as the periodic group is descended. The energy of " $a_1$ " is assumed to fall between the original s and p atomic orbital energies of E and will thus be predominantly localised on the central atom E; the electrons that occupy " $a_1$ " can therefore be considered to have the characteristics of a "lone pair" on E. If the  $n$  in  $EX_n$  is less than 4, there will be  $4 - n$  unused p orbitals on E which will become non-bonding orbitals localised on E. Finally, there will be a set of  $n - 1$  unoccupied E–X antibonding orbitals derived from the combination of p orbitals on the element E and the LGOs of the same symmetry.

Stable electron configurations occur when the orbitals are filled up to a level where a closed shell is obtained and the HOMO-LUMO gap is significantly large. This happens, as indicated in Figure S1, at 3 levels, when the orbitals are filled, up to and including:

- (1) Level 1, i.e., the E–X bonding orbitals and any non-bonding orbitals on X (Type I species);
- (2) Level 2, the " $a_1$ " orbital (Type II species);
- (3) Level 3, the non-bonding orbitals on E (Type III species).

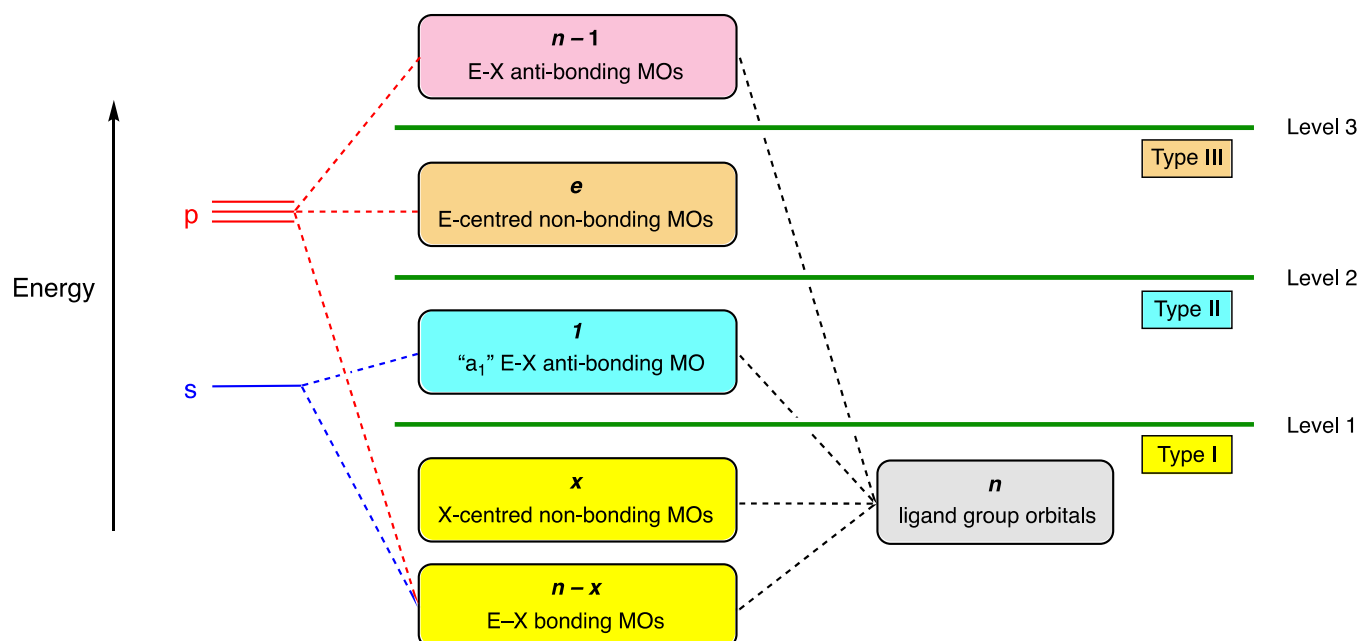

**Figure S1** A generic MO diagram for p-block compounds  $EX_n$  where X is more electronegative than E, the formal electron count is greater than 8, d-orbital involvement is assumed to be negligible, and no account is taken of s-p mixing or  $\pi$ -bonding effects. The number of pairs of electrons that can occupy each of the bands is  $n-x$ ,  $x$ , 1,  $e$  and  $n-1$  respectively. Types I-III and Levels 1-3 are defined in the text.

## 2. Further discussion of MO diagrams for some $EF_n$ compounds

In the main article, the MO diagrams for  $PF_5$ ,  $SF_6$ ,  $IF_3$  and  $XeF_4$  are presented and there is some discussion of how these diagrams correlate with classical concepts such as valence and lone pairs. From a teaching perspective, these correlations can be easily visualised if the MO diagrams are modified so that the electrons that are contributed by E and F are delineated. In Figs. S2-S4, the electrons contributed by E are represented by magenta arrows and the electrons contributed by F are represented by black arrows. This is a formalism, since the electrons in the MOs are not localised exclusively on either E or F.

### 2.1 Lone pairs and valence in $IF_3$ and $XeF_4$

The advantage of codifying the electrons in the manner described above is that it makes obvious (especially for teaching purposes) the valency of E and the electrons that can be classified as "lone pairs" on E. For example, from the MO diagrams in Figures S2 and S3, it is clear that in  $IF_3$ , iodine is

trivalent and has two lone pairs and in  $\text{XeF}_4$ , xenon is tetravalent and also has two lone pairs. These interpretations correlate well with the traditional Lewis structures of these molecules.

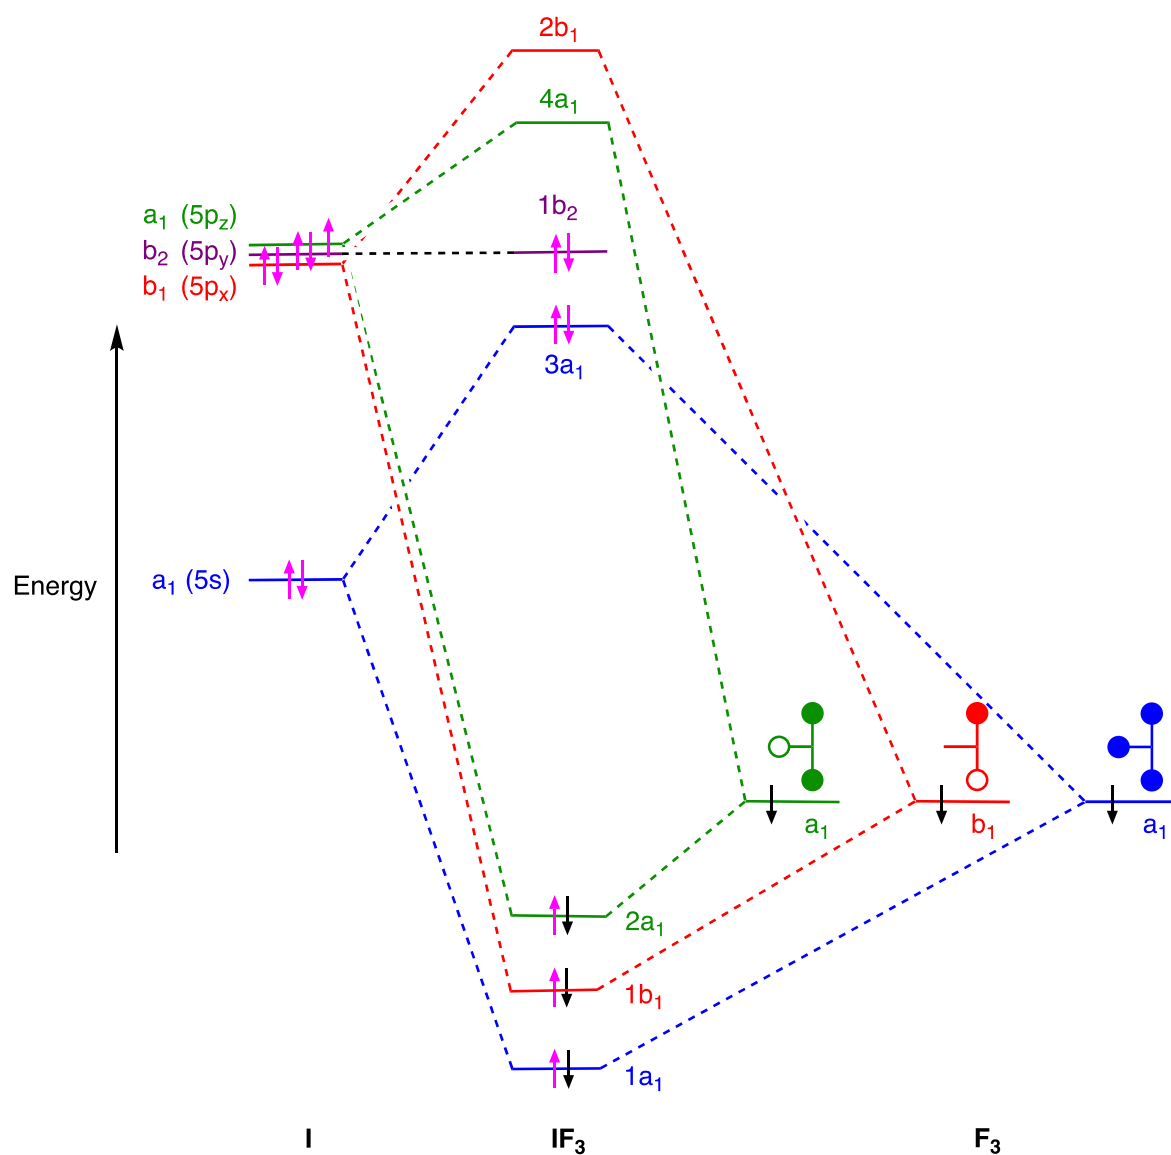

**Figure S2** MO diagram for  $\text{IF}_3$  showing the filling of the energy levels with electrons from iodine (magenta) and the  $\text{F}_3$  LGOs (black). The valency of iodine is 3 and it has 2 "lone pairs" with  $a_1$  and  $b_2$  symmetry.

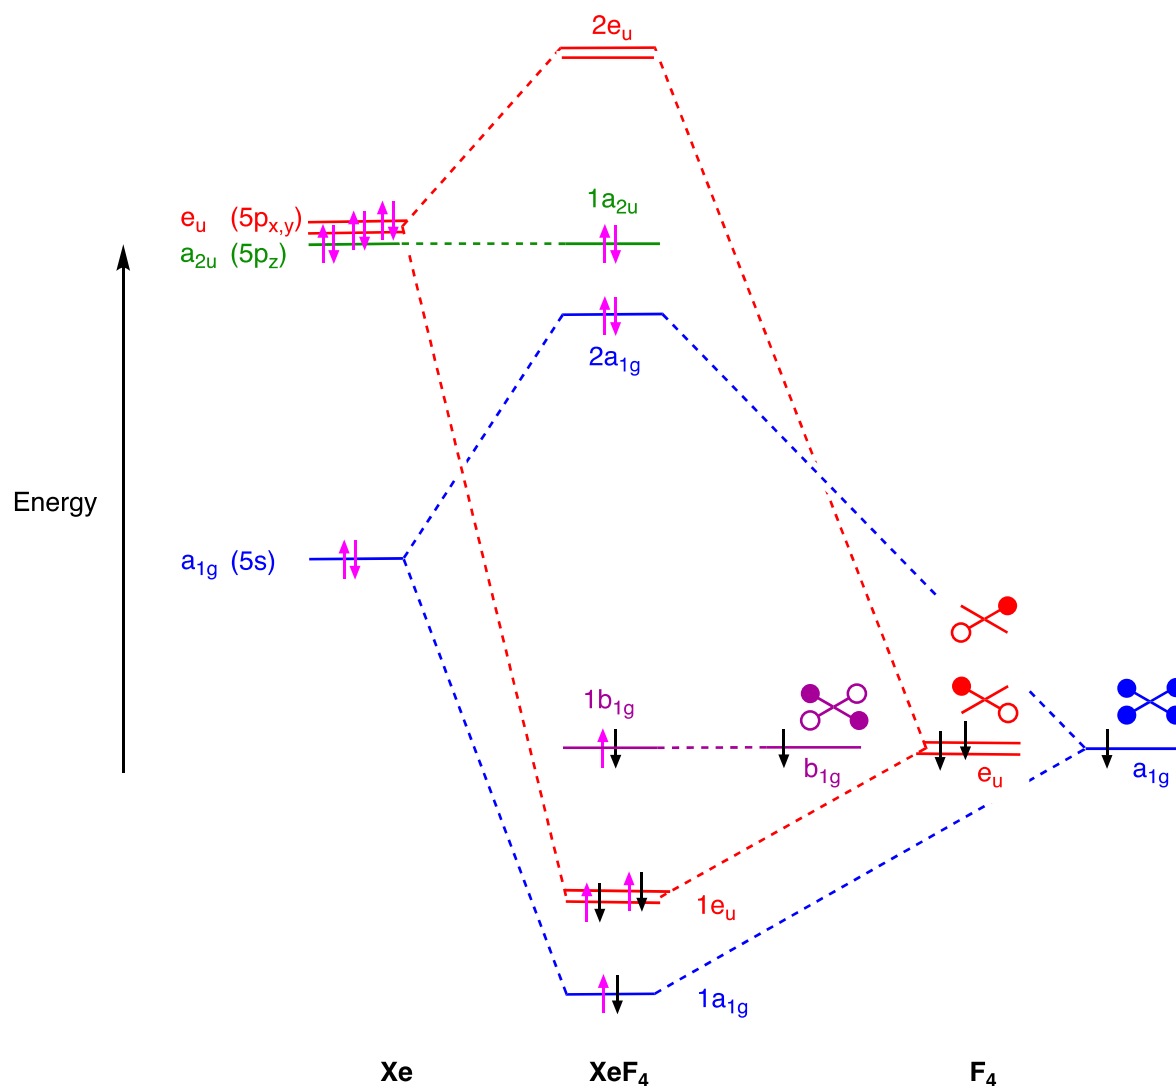

**Figure S3** MO diagram for XeF<sub>4</sub> showing the filling of the energy levels with electrons from xenon (magenta) and the F<sub>4</sub> LGOs (black). The valency of xenon is 4 and it has 2 "lone pairs" with a<sub>1g</sub> and a<sub>2u</sub> symmetry.

In Section 3, the MO diagrams for the various classes of EX<sub>*n*</sub> are shown (see pages S8-S20). A similar analysis of these MO diagrams to that given above for IF<sub>3</sub> and XeF<sub>4</sub> leads to an assignment of the lone pairs on E, from which the valence of E can be determined after taking into account any overall charge on the EX<sub>*n*</sub> species. In each case, the values for the numbers of lone pairs on E and the valence of E (identified in the Notes for each Figure) correlate with the values drawn from the well-known Lewis structures.

## 2.2 Electron delocalisation on to the F ligands in PF<sub>5</sub> and related species

In the MO energy level diagram for PF<sub>5</sub>, the orbital labelled 2a<sub>1</sub>' is essentially non-bonding with respect to P–F and is delocalised over all 5 F atoms. The representation shown in Figure S4 indicates that phosphorus is pentavalent and one of the valence electrons on P is delocalised on to the 5 F atoms. This MO picture is similar to the ionic representation **D** of PF<sub>5</sub> (see Figure S4) proposed by Pauling as [PF<sub>4</sub>]<sup>+</sup> F<sup>−</sup> in which the counteranion could be any one the 5 F atoms, i.e., there are 5 resonance canonical forms of **D** (see discussion in Section 3 of the main article).

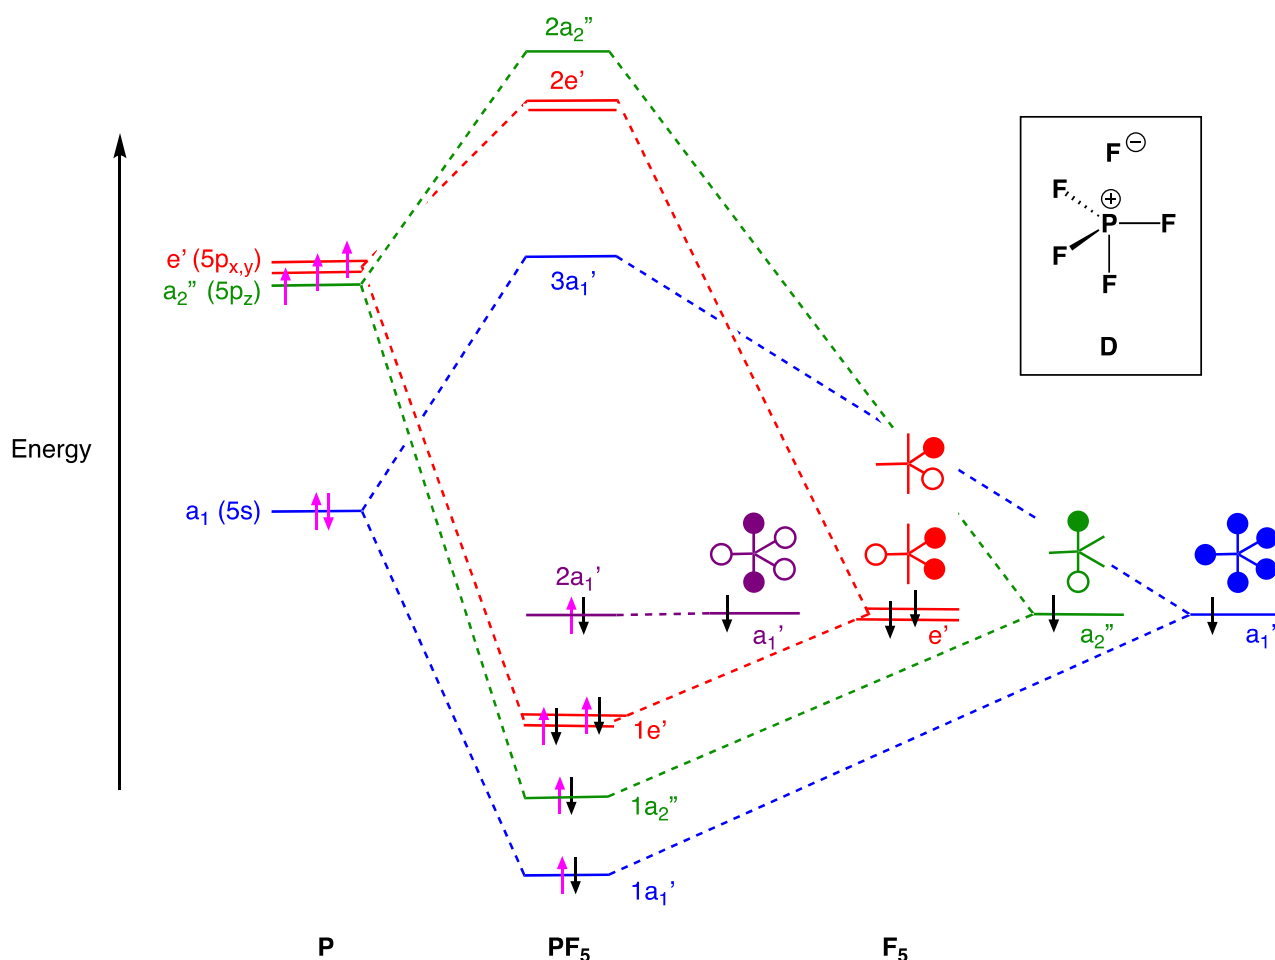

**Figure S4.** MO diagram for PF<sub>5</sub> showing the filling of the energy levels with electrons from phosphorus (magenta) and the F<sub>5</sub> LGOs (black). The phosphorus is pentavalent and one of its valence electrons is in the 2a<sub>1</sub>' MO which is largely localised on the F<sub>5</sub> ensemble. The inset shows a proposed ionic formulation for PF<sub>5</sub>.

A similar picture can be envisaged for SF<sub>6</sub> where two of the sulfur valence electrons are located in the 1e<sub>g</sub> MO which is delocalised on to the 6 F atoms; this is reminiscent of an ionic structure for SF<sub>6</sub> of the

form  $[\text{SF}_4]^{2+} 2\text{F}^-$  which would have multiple resonance canonical forms (see J. M. Galbraith, *J. Chem. Ed.*, 2007, **84**, 783-787). Indeed, any MO picture given in the following Section for an  $\text{EX}_n$  species that contains electrons in non-bonding orbitals that are localised on X, is amenable to this ionic analysis.

From the MO diagram for  $[\text{TeF}_6]^{2-}$  given on page S18, it is not immediately clear how to assign a valency to Te. However, if it is assumed that the electrons from the 2- charge are delocalised on the electronegative F atoms by occupying the  $1e_g$  MO (see Figure S5), then the valency of Te is then readily assigned as 4.

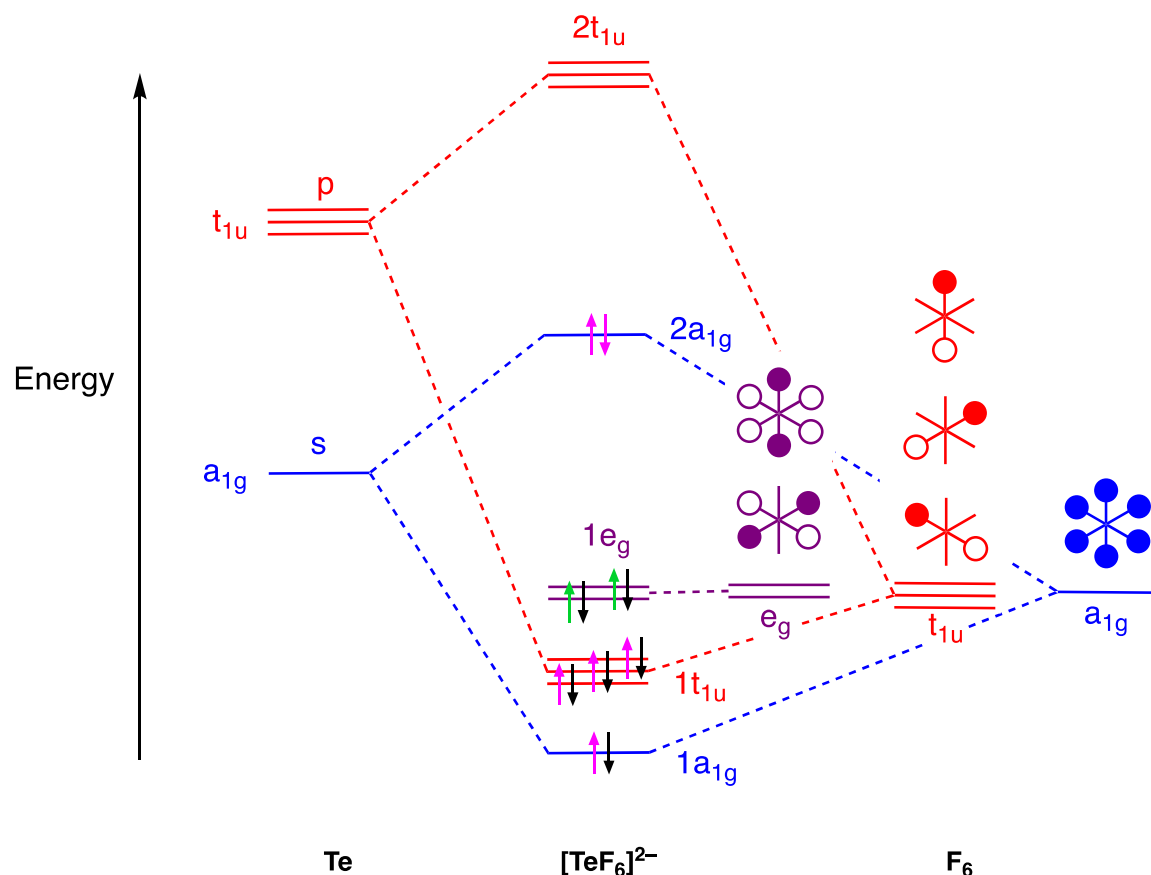

**Figure S5** MO diagram for  $[\text{TeF}_6]^{2-}$  showing the filling of the energy levels with electrons from tellurium (magenta), the  $\text{F}_6$  LGOs (black) and the dianionic charge (green). The valency of tellurium is 4 and it has 1 "lone pairs" with  $a_{1g}$  symmetry.

Similar rationales can be given for other anions such as  $[\text{SiF}_6]^{2-}$  (silicon valence 4),  $[\text{IF}_8]^-$  (iodine valence 7),  $[\text{XeF}_8]^{2-}$  (xenon valence 6).

### 3. General MO energy level diagrams for p-block compounds EX<sub>n</sub>

The MO plots in the following pages are categorised according to the electron count and EX<sub>n</sub>L<sub>m</sub> where *m* is the number of lone pairs L. The colour coding in the Chart below is for the classification of Types I-III compounds given in Figure S1 (page S3). The examples given in the Chart are almost exclusively fluorides although X can, in principle, be any monovalent group with an electronegativity greater than E. In red letters are neutral examples of the particular EX<sub>n</sub>L<sub>m</sub> configuration and the black-lettered examples are charged species that are isoelectronic with the neutral example.

| Maximum Group Valence | 4                                   | 5                                                                                                           | 6                                                                                                                                                                                  | 7                                                                        | 8                                                                                                                                                  |                                                        | Electron Count <sup>a</sup> |
|-----------------------|-------------------------------------|-------------------------------------------------------------------------------------------------------------|------------------------------------------------------------------------------------------------------------------------------------------------------------------------------------|--------------------------------------------------------------------------|----------------------------------------------------------------------------------------------------------------------------------------------------|--------------------------------------------------------|-----------------------------|
|                       | EX <sub>4</sub><br>SiF <sub>4</sub> | EX <sub>3</sub> L<br>PF <sub>3</sub>                                                                        | EX <sub>2</sub> L <sub>2</sub><br>SF <sub>2</sub>                                                                                                                                  | EXL <sub>3</sub><br>IF                                                   | EL <sub>4</sub><br>Xe                                                                                                                              |                                                        | 8                           |
|                       |                                     | EX <sub>5</sub><br>PF <sub>5</sub><br>[SiF <sub>5</sub> ] <sup>-</sup><br>[AlF <sub>5</sub> ] <sup>2-</sup> | EX <sub>4</sub> L<br>SF <sub>4</sub><br>[PF <sub>4</sub> ] <sup>-</sup>                                                                                                            | EX <sub>3</sub> L <sub>2</sub><br>IF <sub>3</sub>                        | EX <sub>2</sub> L <sub>3</sub><br>XeF <sub>2</sub><br>[IF <sub>2</sub> ] <sup>-</sup><br>[I <sub>3</sub> ] <sup>-</sup>                            |                                                        | 10                          |
|                       |                                     |                                                                                                             | EX <sub>6</sub><br>SF <sub>6</sub><br>[PF <sub>6</sub> ] <sup>-</sup><br>[SiF <sub>6</sub> ] <sup>2-</sup><br>[AlF <sub>6</sub> ] <sup>3-</sup><br>[IF <sub>6</sub> ] <sup>+</sup> | EX <sub>5</sub> L<br>IF <sub>5</sub><br>[TeF <sub>5</sub> ] <sup>-</sup> | EX <sub>4</sub> L <sub>2</sub><br>XeF <sub>4</sub><br>[IF <sub>4</sub> ] <sup>-</sup>                                                              |                                                        | 12                          |
|                       |                                     |                                                                                                             |                                                                                                                                                                                    | EX <sub>7</sub><br>IF <sub>7</sub><br>[TeF <sub>7</sub> ] <sup>-</sup>   | EX <sub>6</sub> L<br>XeF <sub>6</sub><br>[IF <sub>6</sub> ] <sup>-</sup><br>[TeF <sub>6</sub> ] <sup>2-</sup><br>[SbF <sub>6</sub> ] <sup>3-</sup> |                                                        | 14                          |
|                       |                                     |                                                                                                             |                                                                                                                                                                                    |                                                                          | EX <sub>8</sub><br>XeF <sub>8</sub><br>[IF <sub>8</sub> ] <sup>-</sup>                                                                             |                                                        | 16                          |
|                       |                                     |                                                                                                             |                                                                                                                                                                                    |                                                                          |                                                                                                                                                    | EX <sub>8</sub> L<br>[XeF <sub>8</sub> ] <sup>2-</sup> | 18                          |

- a This is the valence electron count for the central element, E, obtained from the total number of valence electrons for E plus 1 for each of the X atoms and taking account of the charge: electrons are added for a negative charge and subtracted for a positive charge.

### 3.1 Ten-electron systems: EX<sub>5</sub>, EX<sub>4</sub>L, EX<sub>3</sub>L<sub>2</sub>, EX<sub>2</sub>L<sub>3</sub>

#### 3.1.1 EX<sub>5</sub> (D<sub>3h</sub>)

An example of this configuration is PF<sub>5</sub> and this is a Type I compound (see Fig. S1).

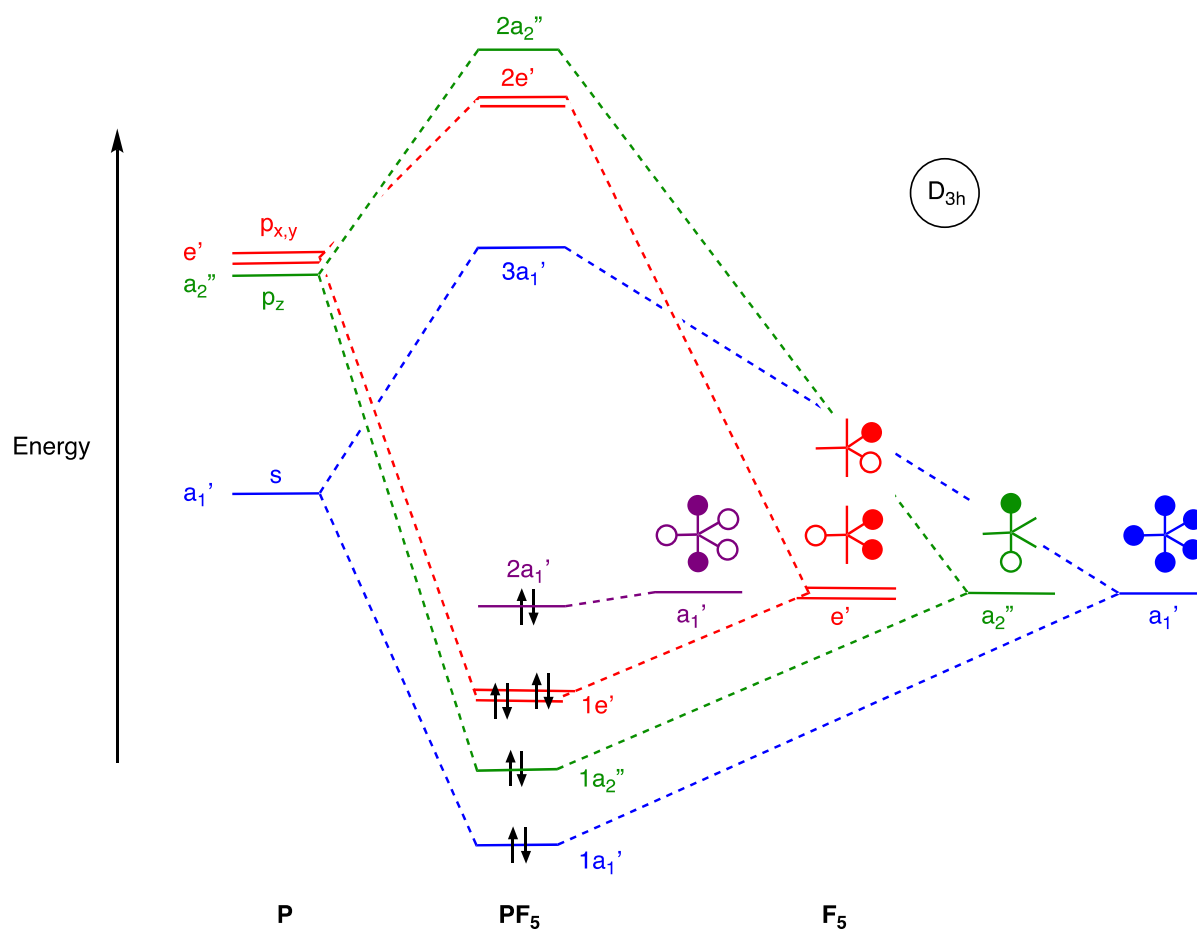

#### Notes

- The combination of  $1a_2''$  and  $2a_1'$  is equivalent to a localised 3c,4e interaction.
- The non-bonding  $2a_1'$  is delocalised over the 5 F atoms.
- P is pentavalent.

### 3.1.2 EX<sub>4</sub>L (C<sub>2v</sub>)

An example of this configuration is SF<sub>4</sub> and this is a Type II compound (see Fig. S1).

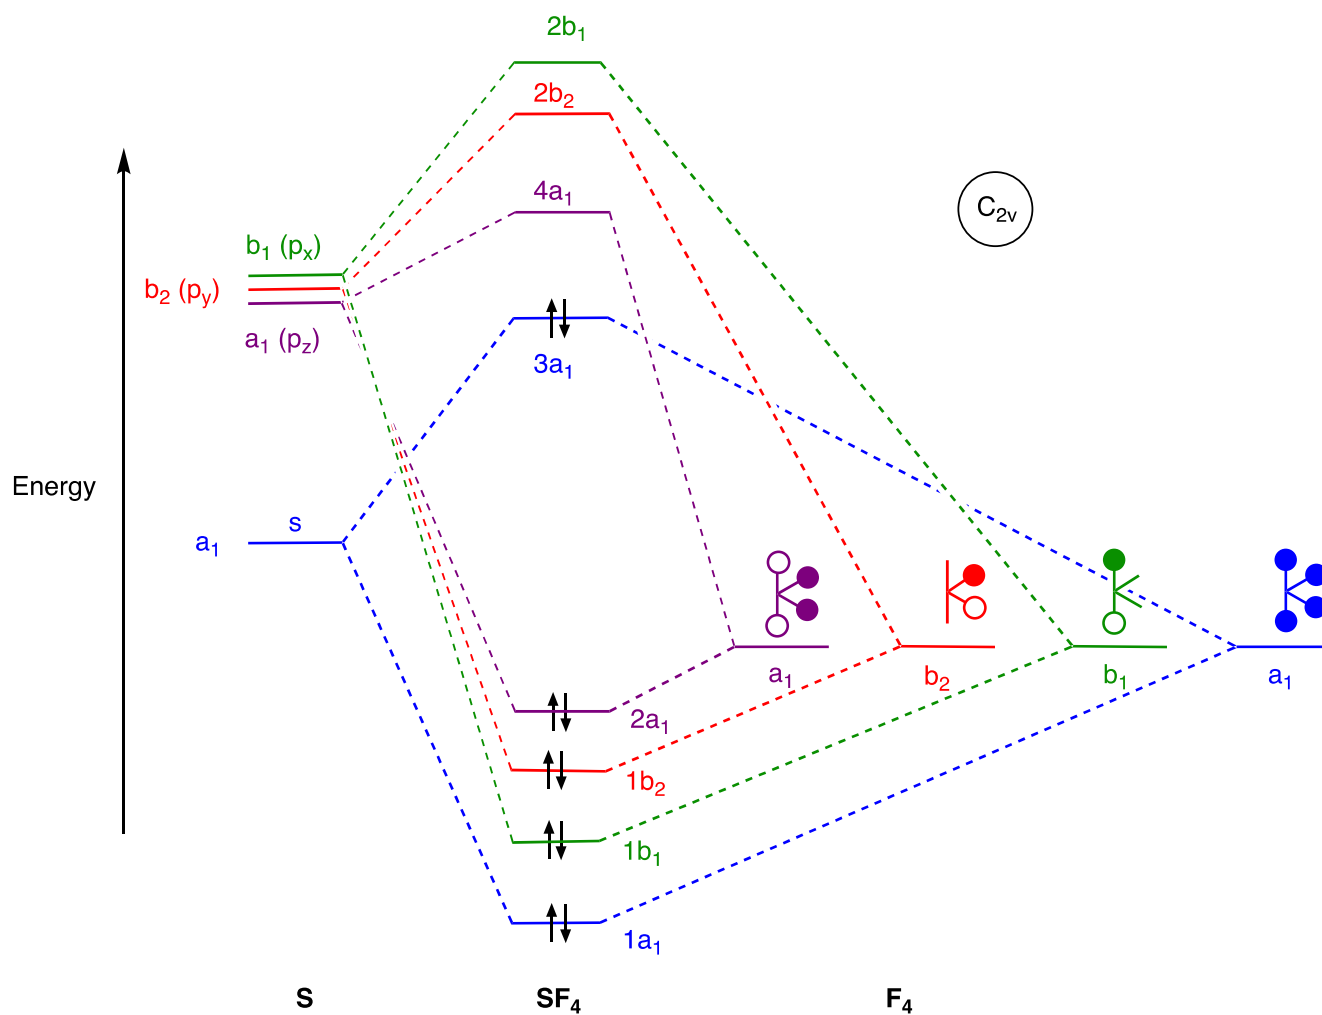

#### Notes

- If the  $3a_1$  orbital is considered to be a lone pair, then this diagram is compatible with the traditional Lewis structure of SF<sub>4</sub> with 4 S–F bonds and a lone pair.
- S is tetravalent.

### 3.1.3 $\text{EX}_3\text{L}_2$ ( $\text{C}_{2v}$ )

An example of this configuration is  $\text{IF}_3$  and this is a Type III compound (see Fig. S1).

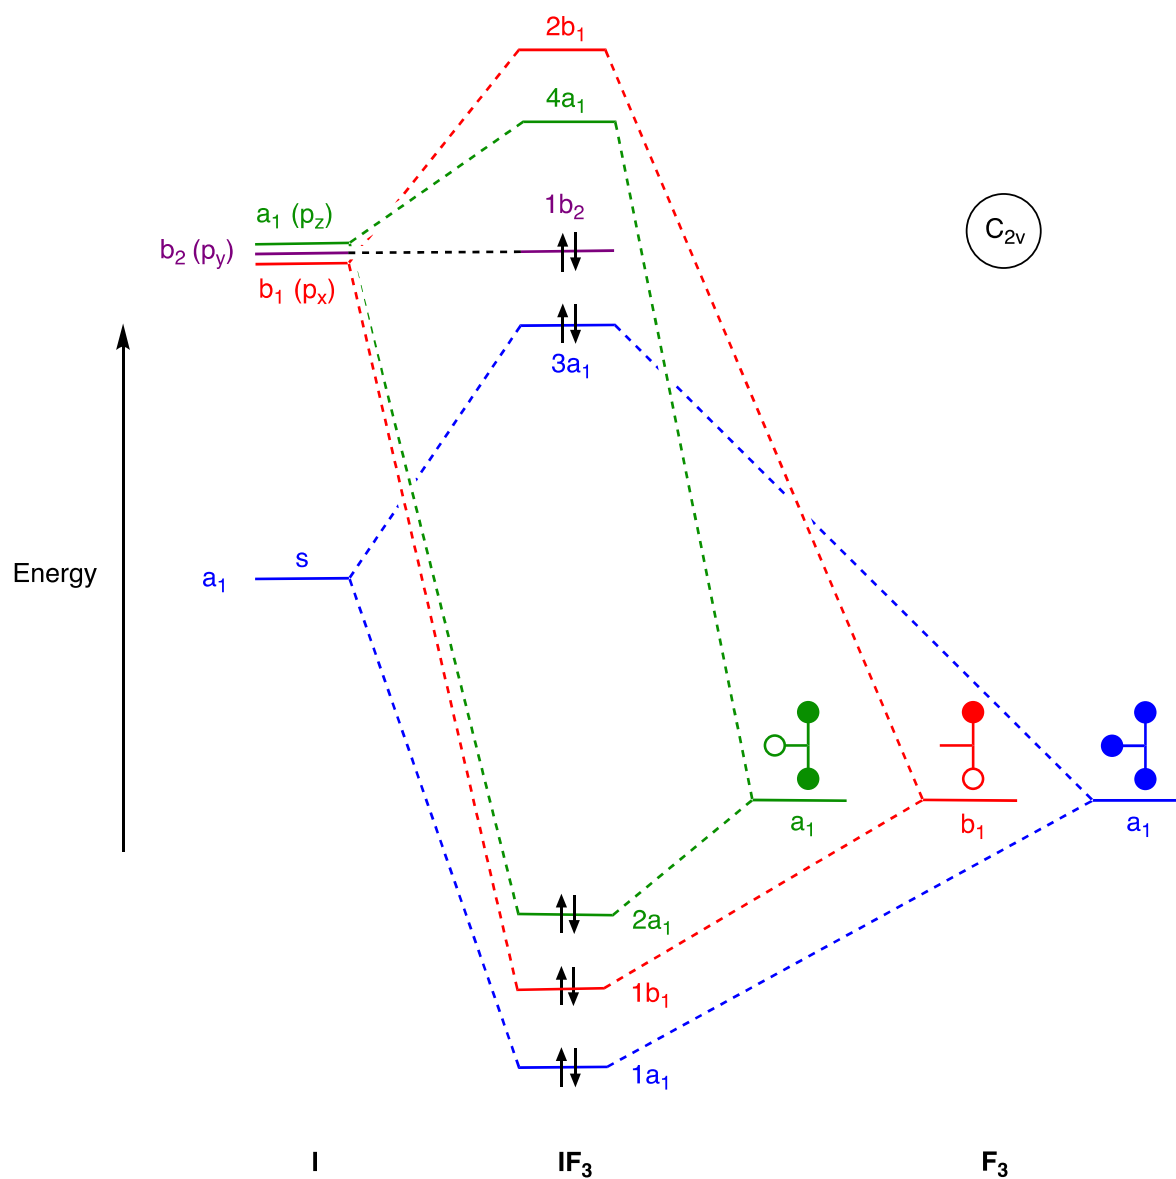

#### Notes

- If the  $3a_1$  and  $1b_2$  orbitals are considered to be lone pairs, then this diagram is compatible with the traditional Lewis structure of  $\text{IF}_3$  with 3 I–F bonds and 2 lone pairs.
- I is trivalent.

### 3.1.4 $\text{EX}_2\text{L}_3$ ( $\text{D}_{\infty\text{h}}$ )

An example of this configuration is  $\text{XeF}_2$  and this is a Type III compound (see Fig. S1).

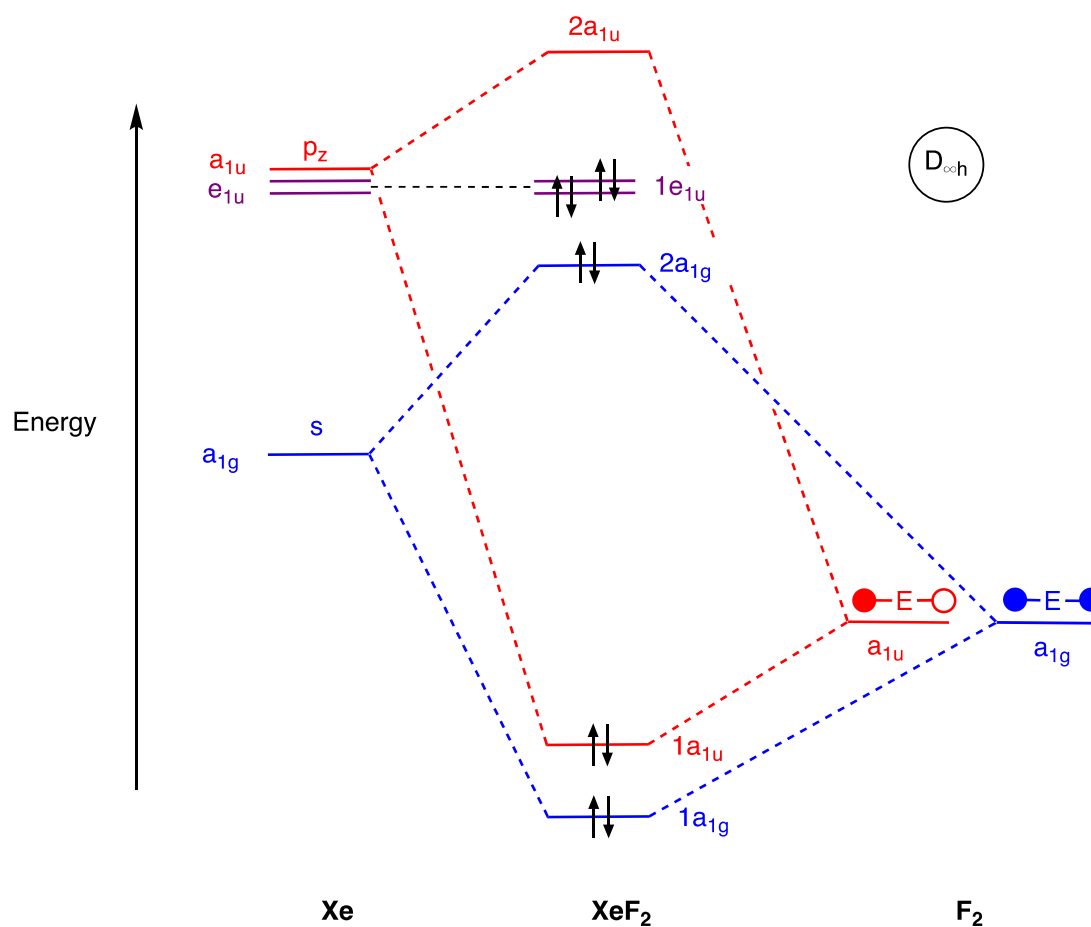

#### Notes

- If the  $2a_{1g}$  and  $1e_{2u}$  orbitals are considered to be lone pairs, then this diagram is compatible with the traditional Lewis structure of  $\text{XeF}_2$  with 2 Xe–F bonds and 3 lone pairs.
- Xe is divalent.

## 3.2 Twelve-electron systems: $\text{EX}_6$ , $\text{EX}_5\text{L}$ , $\text{EX}_4\text{L}_2$ , $\text{EX}_2\text{L}_3$

### 3.2.1 $\text{EX}_6 (\text{O}_h)$

An example of this configuration is  $\text{SF}_6$  and this is a Type I compound (see Fig. S1).

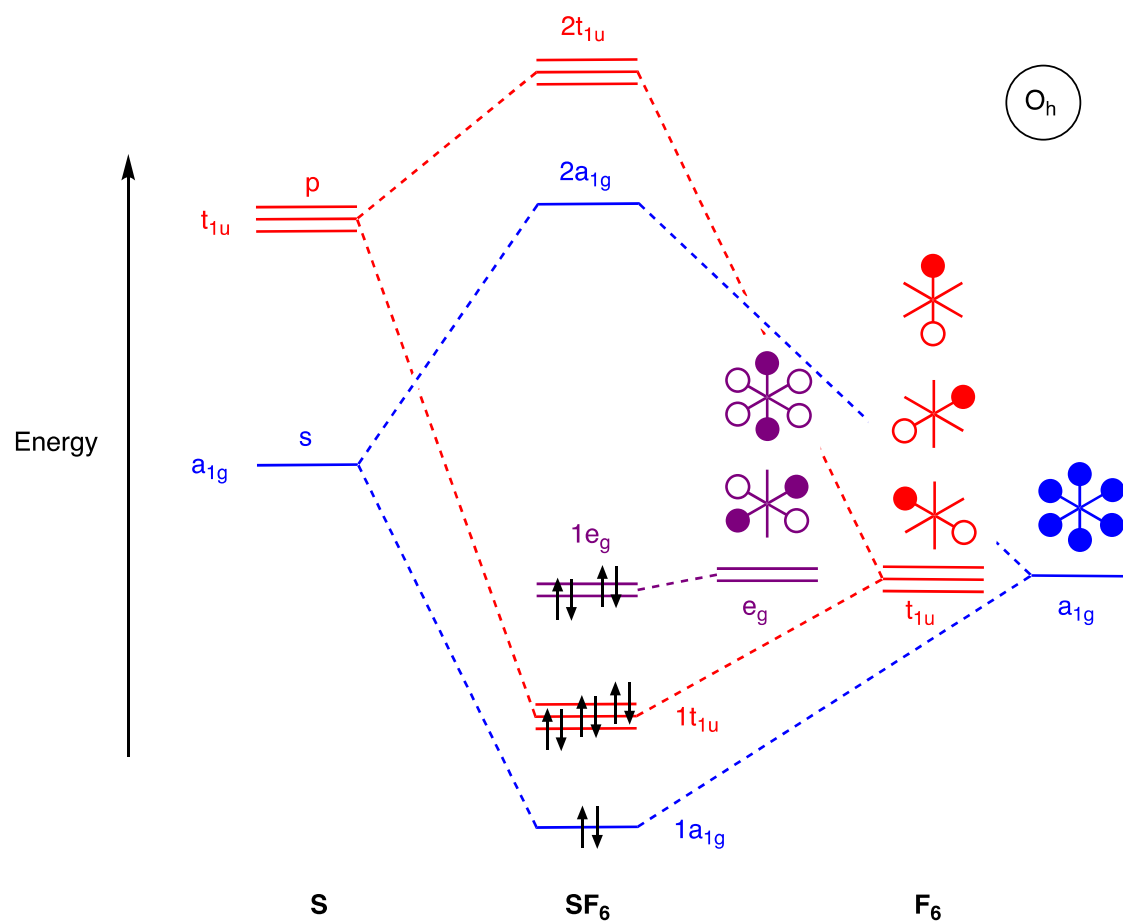

#### Notes

- The non-bonding  $1e_g$  is delocalised over the 6 F atoms.
- S is hexavalent.

### 3.2.2 EX<sub>5</sub>L (C<sub>4v</sub>)

An example of this configuration is IF<sub>5</sub> and this is a Type II compound (see Fig. S1).

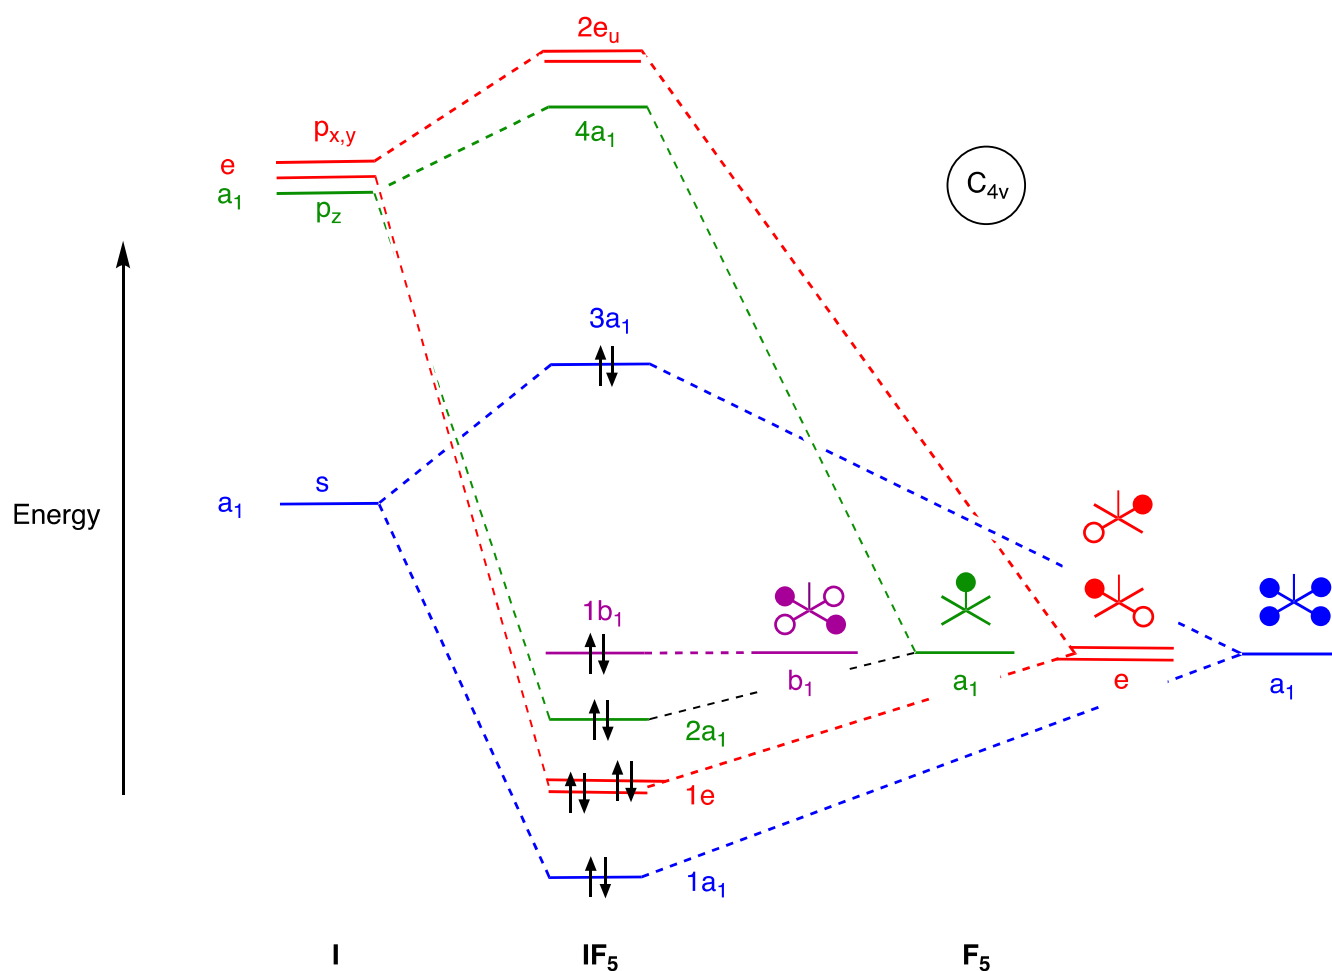

#### Notes

- If the 3a<sub>1</sub> orbital is considered to be a lone pair, then this diagram is compatible with the traditional Lewis structure of IF<sub>5</sub> having 5 I–F bonds and 1 lone pair.
- The non-bonding 1b<sub>1</sub> is delocalised over the 4 basal F atoms.
- I is pentavalent.

### 3.2.3 EX<sub>4</sub>L<sub>2</sub> (D<sub>4h</sub>)

An example of this configuration is XeF<sub>4</sub> and this is a Type III compound (see Fig. S1).

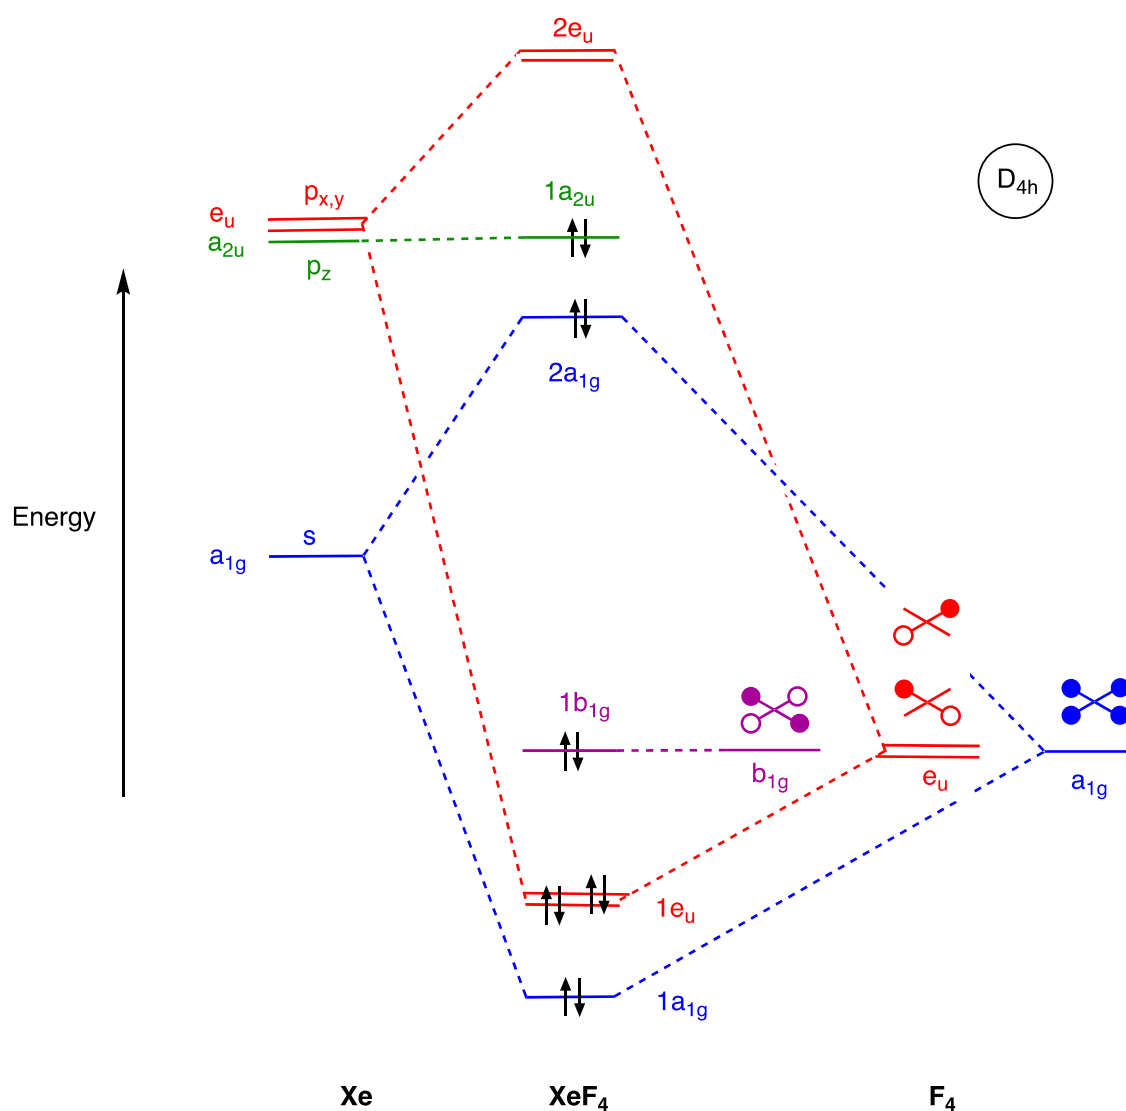

#### Notes

- If the 2a<sub>1g</sub> and 1a<sub>2u</sub> orbitals are considered to be lone pairs, then this diagram is compatible with the traditional Lewis structure of XeF<sub>4</sub> with 4 Xe–F bonds and 2 lone pairs.
- The non-bonding 1b<sub>1g</sub> is delocalised over the 4 F atoms.
- Xe is tetravalent.

### 3.3 Fourteen-electron systems: EX<sub>7</sub>, EX<sub>6</sub>L,

#### 3.3.1 EX<sub>7</sub> (D<sub>5h</sub>)

An example of this configuration is IF<sub>7</sub> and this is a Type I compound (see Fig. S1).

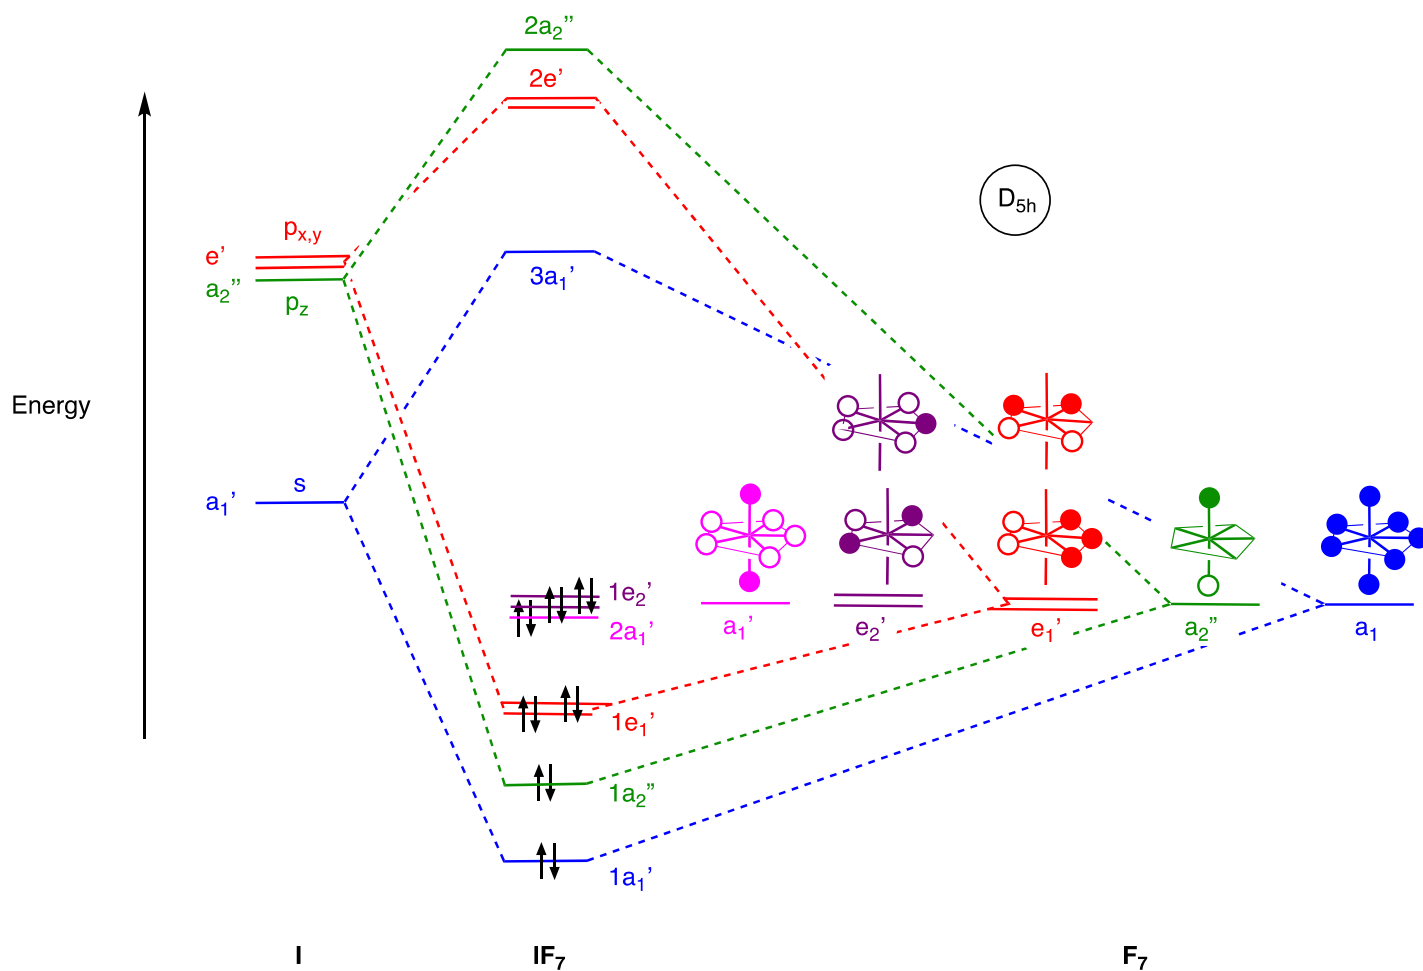

#### Notes

- The 2a<sub>1</sub>' is delocalised over all 7 F atoms and the e<sub>2</sub>' is delocalised over the 5 equatorial F atoms.
- I is heptavalent.

### 3.3.2 EX<sub>6</sub>L (C<sub>3v</sub>)

An example of this configuration is XeF<sub>6</sub> and this is a Type II compound (see Fig. S1).

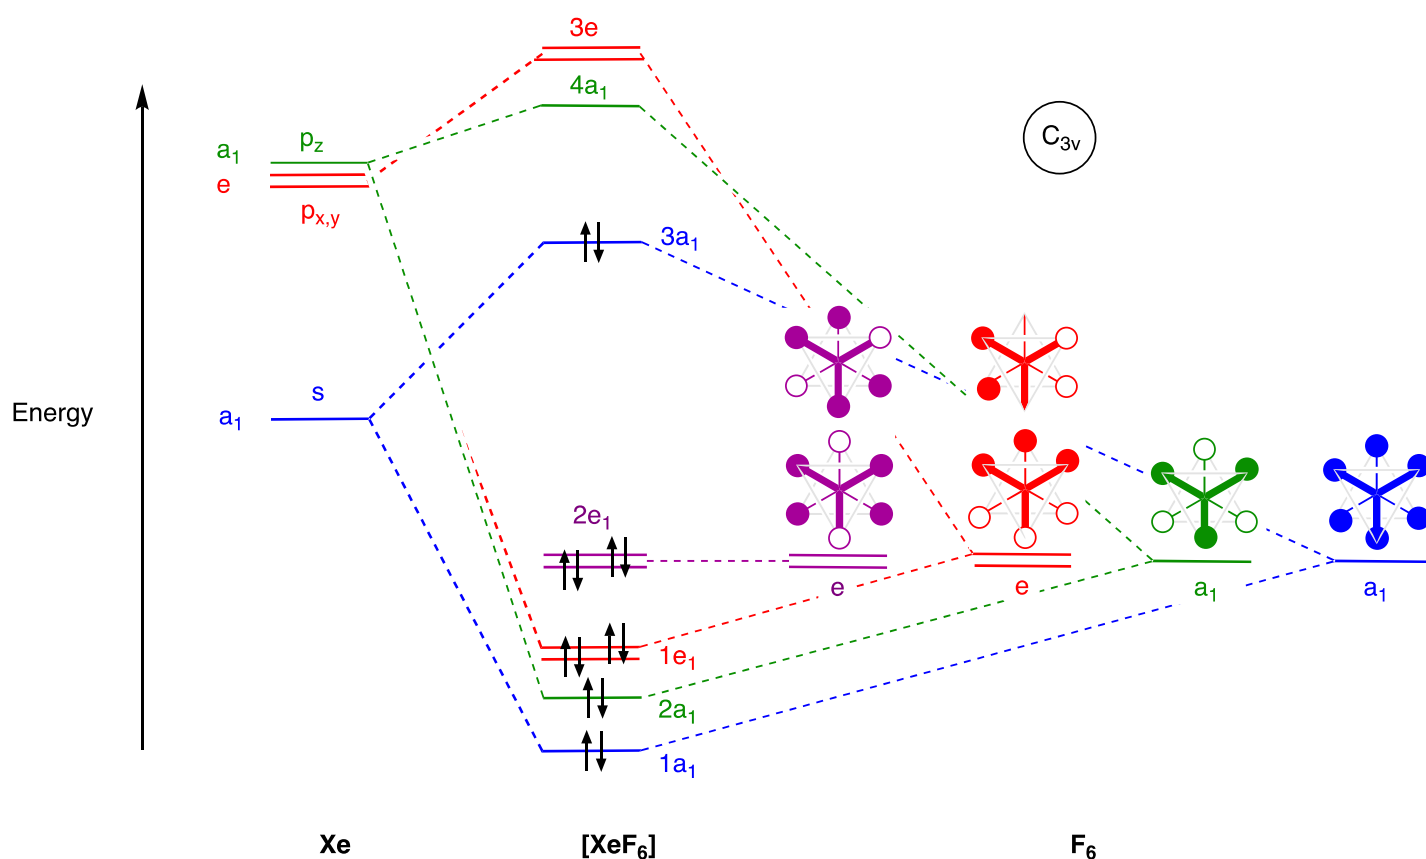

#### Notes

- If the 3a<sub>1</sub> orbital is considered to be a lone pair, then this diagram is compatible with the traditional Lewis structure of XeF<sub>6</sub> having 1 lone pair.
- Calculations show that this face-capped octahedral (C<sub>3v</sub>) structure is the lowest energy structure, but two other geometries (C<sub>2v</sub> and O<sub>h</sub>) are very close in energy.
- The non-bonded 2e<sub>1</sub> is delocalised over the 6 F atoms.
- Xe is hexavalent.

### 3.3.3 EX<sub>6</sub>L (O<sub>h</sub>)

An example of this configuration is [TeF<sub>6</sub>]<sup>2-</sup> and this is a Type II species (see Fig. S1).

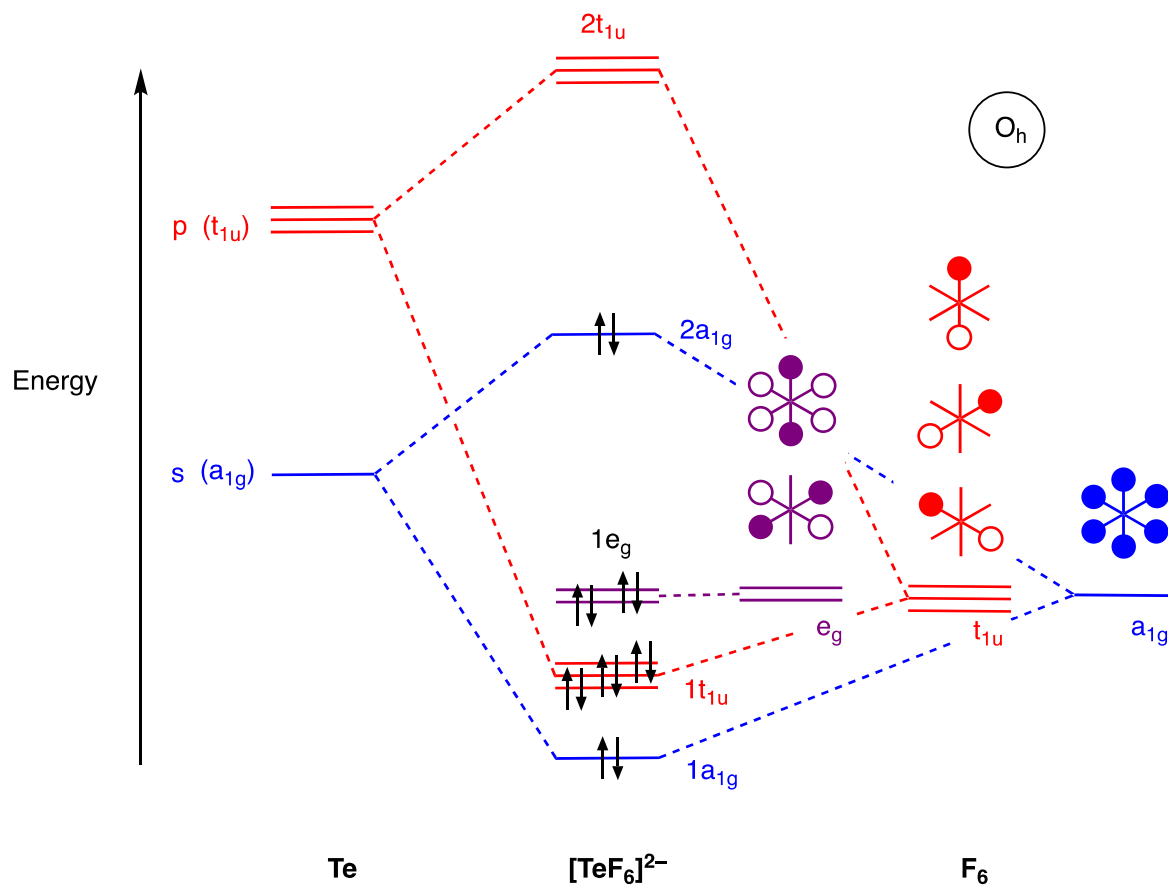

#### Notes

- The non-bonded 1e<sub>g</sub> is delocalised over the 6 F atoms.
- If the 2a<sub>1g</sub> orbital is considered to be a lone pair on Te, of the 12e in the lower energy levels, 6e are contributed by the 6F and 2e are associated with the 2- charge therefore this diagram is compatible with Te being tetravalent.

### 3.4 Sixteen-electron systems: EX<sub>8</sub> (D<sub>4d</sub>)

An example of this configuration is [IF<sub>8</sub>]<sup>−</sup> and this is a Type I species (see Fig. S1).

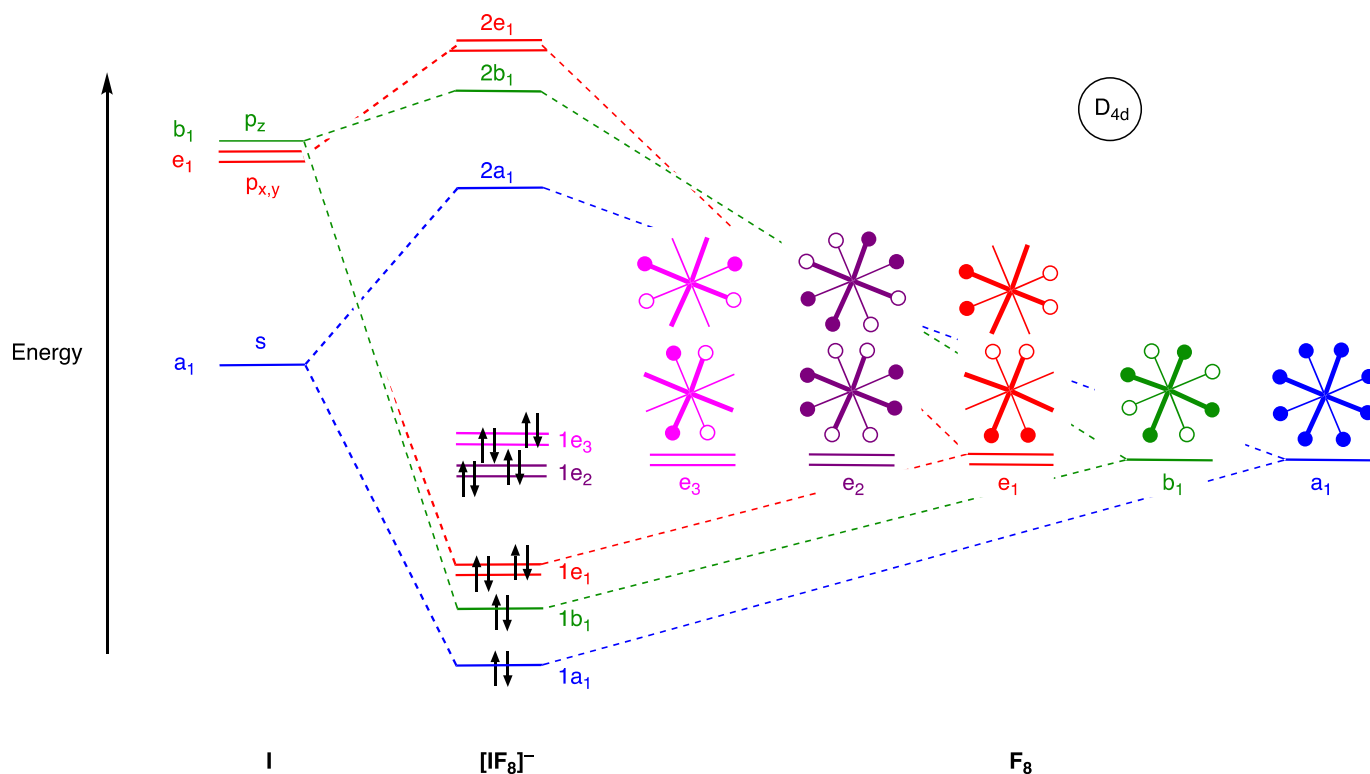

#### Notes

- The neutral compound XeF<sub>8</sub> is unknown but calculations indicate that it would have the same D<sub>4d</sub> structure as above.
- The non-bonding 1e<sub>2</sub> and 1e<sub>3</sub> are delocalised over the 8 F atoms
- Of the 16e, 8e are contributed by the 8F and 1e is associated with the 1− charge, and so the I is heptavalent.

### 3.5 Eighteen-electron systems: EX<sub>8</sub>L (D<sub>4d</sub>)

The only example of this configuration is [XeF<sub>8</sub>]<sup>2-</sup> and this is a Type II species (see Fig. S1).

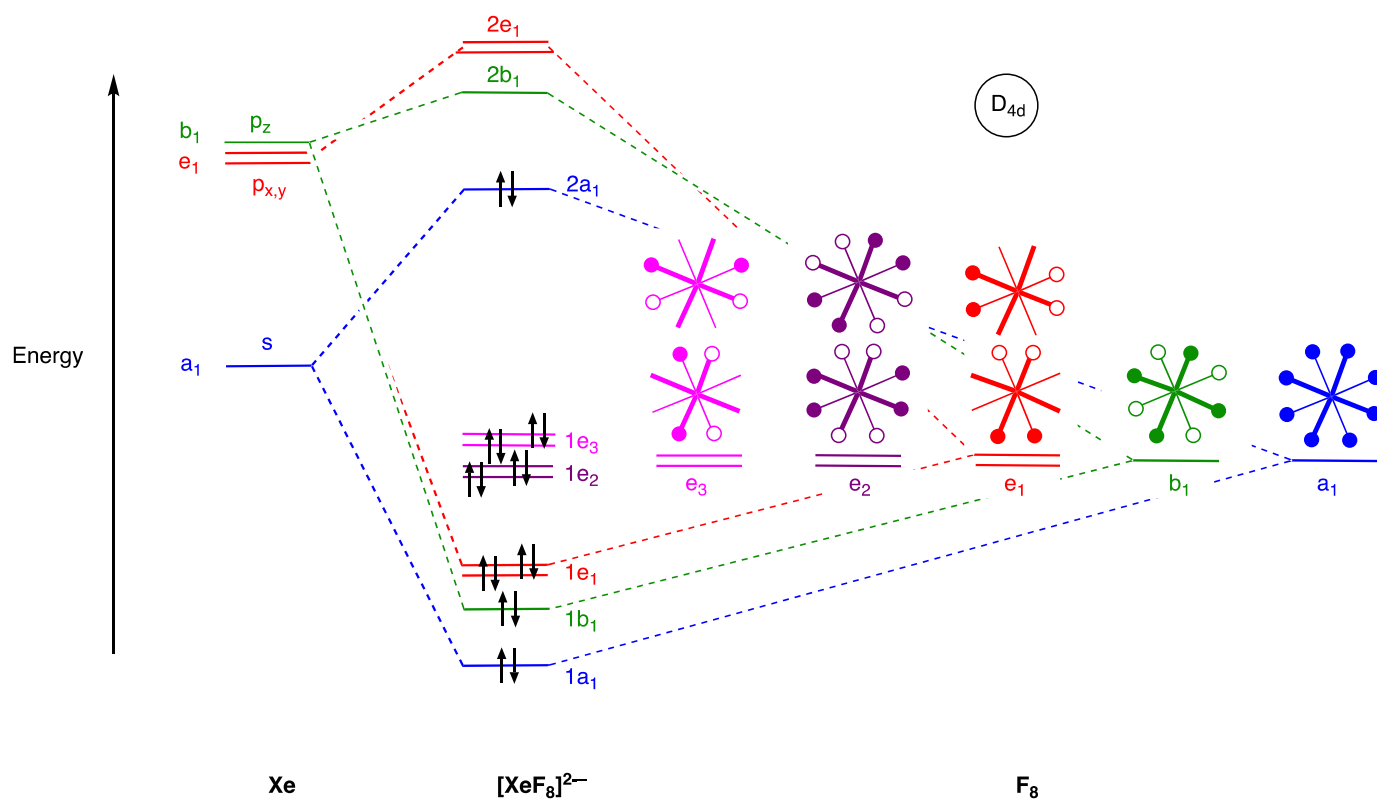

#### Notes

- This 18e dianion has no possible neutral analogue.
- The non-bonding 1e<sub>2</sub> and 1e<sub>3</sub> are delocalised over the 8 F atoms.
- If the 2a<sub>1</sub> orbital is considered to be a lone pair on Xe, of the 16e in the lower energy MOs, 8e are contributed by the 8F and 2e are associated with the 2- charge, and hence the Xe is hexavalent.
